CORRECTION

# Correction: Changes in Prevalence of HIV or Syphilis among Male Sex Workers and Non-Commercial Men Who Have Sex with Men in Shenzhen, China: Results of a Second Survey

Yuanwei Huang, Yanting Zhang, Ke Li, Jin Zhao

There are errors in Tables 3 and 4, and corresponding errors in the Results section under the subheading “Factors correlated with HIV infection of MSWs and ncMSM.” Please see the corrected Tables 3 and 4 here.

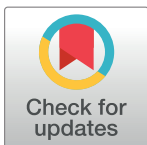

 OPEN ACCESS

**Citation:** Huang Y, Zhang Y, Li K, Zhao J (2017) Correction: Changes in Prevalence of HIV or Syphilis among Male Sex Workers and Non-Commercial Men Who Have Sex with Men in Shenzhen, China: Results of a Second Survey. PLoS ONE 12(3): e0175017. <https://doi.org/10.1371/journal.pone.0175017>

**Published:** March 28, 2017

**Copyright:** © 2017 Huang et al. This is an open access article distributed under the terms of the [Creative Commons Attribution License](https://creativecommons.org/licenses/by/4.0/), which permits unrestricted use, distribution, and reproduction in any medium, provided the original author and source are credited.

**Table 3. Estimated HIV risk/prevention behavior in MSWs and ncMSM.**

|                                              | MSWs (n = 489)          |              |                         |              | ncMSM (n = 476)      |              |                       |              |
|----------------------------------------------|-------------------------|--------------|-------------------------|--------------|----------------------|--------------|-----------------------|--------------|
|                                              | COR (95%CI)             | P            | AOR (95%CI)             | P            | COR (95%CI)          | P            | AOR (95%CI)           | P            |
| Syphilis infection                           | <b>10.2 (2.9,35.5)</b>  | <b>0.000</b> | <b>9.0 (2.4,33.5)</b>   | <b>0.001</b> | <b>5.6 (3.3,9.6)</b> | <b>0.000</b> | <b>5.9 (3.2,10.9)</b> | <b>0.000</b> |
| Ever diagnosed with STIs                     | <b>12.1 (1.2,124.3)</b> | <b>0.036</b> | <b>13.9 (1.5,134.6)</b> | <b>0.045</b> | 1.0 (0.5,2.3)        | 0.911        | 1.3 (0.5,3.4)         | 0.557        |
| Tested for HIV                               | <b>3.4 (1.2–9.8)</b>    | <b>0.026</b> | 2.8 (0.7,11.1)          | 0.152        | <b>0.4 (0.2,0.6)</b> | <b>0.000</b> | <b>0.4 (0.2,0.7)</b>  | <b>0.001</b> |
| Condom use with male sex partner             | <b>0.3 (0.1,0.8)</b>    | <b>0.022</b> | <b>0.3 (0.1,0.9)</b>    | <b>0.046</b> | 0.8 (0.5,1.4)        | 0.488        | 0.7 (0.4,1.5)         | 0.485        |
| Anal sex role (both)                         | <b>9.2 (1.9,43.8)</b>   | <b>0.006</b> | 3.6 (0.4,32.3)          | 0.251        | 0.7 (0.3,1.4)        | 0.323        | -                     | -            |
| Younger in age(<20)                          | 0.3 (0.1,1.6)           | 0.179        | 0.3 (0.1,2.6)           | 0.280        | <b>0.6 (0.4,0.9)</b> | <b>0.048</b> | 0.6 (0.3,1.2)         | 0.181        |
| Lower education (Junior high school or less) | 2.1 (0.3,17.3)          | 0.491        | 7.6 (0.4,160.9)         | 0.191        | <b>2.6 (1.4,4.7)</b> | <b>0.002</b> | <b>2.1 (1.0,4.2)</b>  | <b>0.049</b> |
| First sex partner (male)                     | 1.1 (0.3,3.4)           | 0.921        | 5.2 (0.9,31.7)          | 0.072        | <b>2.1 (1.3,3.4)</b> | <b>0.003</b> | <b>2.1 (1.2,3.9)</b>  | <b>0.014</b> |

OR, odds ratio

COR, crude OR

Variables included in the multiple logistic regression model: HIV/syphilis infection, age, education, sex role, history of HIV test, history of STIs, condom use, first sex partner

AOR, adjusted OR, adjusted for other variables listed in the text

STI, sexually transmitted infection

Significant results are in bold (P<0.05)

<https://doi.org/10.1371/journal.pone.0175017.t001>

**Table 4. Factors correlated with combined HIV infection.**

| Characteristics                 | HIV+/total | Univariate     |       | Adjusted for MSM type |       |
|---------------------------------|------------|----------------|-------|-----------------------|-------|
|                                 |            | OR (95%CI)     | P     | OR (95%CI)            | P     |
| Syphilis-positive               |            |                |       |                       |       |
| No                              | 55/860     | 1              |       | 1                     |       |
| Yes                             | 39/105     | 8.6 (5.3,14.0) | 0.000 | 6.1 (3.7,10.1)        | 0.000 |
| Ever diagnosed with STIs        |            |                |       |                       |       |
| No                              | 85/915     | 1              |       | NS                    |       |
| Yes                             | 9/50       | 2.1 (1.0,4.6)  | 0.048 | NS                    |       |
| Age, years                      |            |                |       |                       |       |
| <20                             | 2/23       | 1              |       | 1                     |       |
| 20–29                           | 36/639     | 0.6 (0.1,2.7)  | 0.539 | NS                    |       |
| ≥30                             | 56/303     | 2.3 (0.5,10.4) | 0.250 | NS                    |       |
| Education                       |            |                |       |                       |       |
| Junior high school or less      | 32/219     | 1              |       | 1                     |       |
| Senior high school              | 41/448     | 0.6 (0.4,0.9)  | 0.035 | NS                    |       |
| College or above                | 21/298     | 0.4 (0.2,0.8)  | 0.006 | 0.3 (0.2,0.5)         | 0.000 |
| Employment                      |            |                |       |                       |       |
| Full-time employed              | 80/848     | 1              |       | 1                     |       |
| Unemployed/part-time/retired    | 12/104     | 1.3 (0.7,2.4)  | 0.494 | NS                    |       |
| Student                         | 2/13       | 1.7 (0.4,8.0)  | 0.474 | NS                    |       |
| Monthly income, RMB             |            |                |       |                       |       |
| ≤3000                           | 24/174     | 1              |       | 1                     |       |
| 3001–5000                       | 49/402     | 0.9 (0.5,1.5)  | 0.595 | NS                    |       |
| >5000                           | 21/389     | 0.4 (0.2,0.7)  | 0.001 | NS                    |       |
| Marital status                  |            |                |       |                       |       |
| Unmarried                       | 64/810     | 1              |       | 1                     |       |
| Married                         | 30/155     | 2.8 (1.7,4.5)  | 0.000 | NS                    |       |
| Sexual orientation              |            |                |       |                       |       |
| Gay                             | 54/631     | 1              |       | 1                     |       |
| Bisexual                        | 26/147     | 2.3 (1.4,3.8)  | 0.001 | 1.8 (1.1,3.0)         | 0.033 |
| Heterosexual or unsure          | 14/187     | 0.9 (0.5,1.6)  | 0.641 | NS                    |       |
| Anal sex role                   |            |                |       |                       |       |
| Insertive only                  | 32/406     | 1              |       | 1                     |       |
| Receptive only                  | 13/90      | 1.9 (0.9,3.9)  | 0.053 | NS                    |       |
| Both                            | 49/469     | 1.4 (0.9,2.2)  | 0.217 | NS                    |       |
| Gender of first sexual partner  |            |                |       |                       |       |
| Female                          | 41/285     | 1              |       | 1                     |       |
| Male                            | 53/680     | 0.5 (0.3,0.7)  | 0.002 | 0.5 (0.3,0.8)         | 0.005 |
| Age at sex debut, years         |            |                |       |                       |       |
| ≤18                             | 15/196     | 1              |       | 1                     |       |
| 19–25                           | 58/653     | 1.2 (0.6,2.1)  | 0.591 | NS                    |       |
| ≥26                             | 21/115     | 2.7 (1.3,5.4)  | 0.006 | NS                    |       |
| Male sex partner <sup>1</sup>   |            |                |       |                       |       |
| 0                               | 17/229     | 1              |       | 1                     |       |
| 1                               | 18/200     | 1.2 (0.6,2.5)  | 0.552 | NS                    |       |
| >1                              | 59/536     | 1.5 (0.9,2.7)  | 0.132 | NS                    |       |
| Female sex partner <sup>1</sup> |            |                |       |                       |       |
| 0                               | 85/865     | 1              |       | 1                     |       |

(Continued)

Table 4. (Continued)

| Characteristics                                    | HIV+/total | Univariate    |       | Adjusted for MSM type |       |
|----------------------------------------------------|------------|---------------|-------|-----------------------|-------|
|                                                    |            | OR (95%CI)    | P     | OR (95%CI)            | P     |
| 1                                                  | 8/53       | 1.6 (0.7,3.5) | 0.222 | NS                    |       |
| >1                                                 | 1/47       | 0.2 (0.1,1.5) | 0.113 | NS                    |       |
| Had one-night stand with male partner <sup>1</sup> |            |               |       |                       |       |
| No                                                 | 29/364     | 1             |       | 1                     |       |
| Yes                                                | 65/601     | 1.4 (0.9,2.2) | 0.148 | NS                    |       |
| Group sex <sup>1</sup>                             |            |               |       |                       |       |
| No                                                 | 81/873     | 1             |       | 1                     |       |
| Yes                                                | 13/92      | 1.6 (0.9,3.0) | 0.135 | NS                    |       |
| Condom use with male sex partner <sup>1</sup>      |            |               |       |                       |       |
| No                                                 | 25/217     | 1             |       | 1                     |       |
| Yes                                                | 69/748     | 0.8 (0.5,1.3) | 0.315 | NS                    |       |
| Condom use with female sex partner <sup>1</sup>    |            |               |       |                       |       |
| No                                                 | 87/892     | 1             |       | 1                     |       |
| Yes                                                | 7/73       | 0.9 (0.4,2.2) | 0.964 | NS                    |       |
| Ever used illicit drugs                            |            |               |       |                       |       |
| No                                                 | 64/648     | 1             |       | 1                     |       |
| Yes                                                | 30/317     | 1.0 (0.6,1.5) | 0.839 | NS                    |       |
| Had a previous HIV test                            |            |               |       |                       |       |
| No                                                 | 51/543     | 1             |       | 1                     |       |
| Yes                                                | 43/422     | 1.1 (0.7,1.7) | 0.679 | 0.5 (0.3,0.8)         | 0.006 |

<sup>1</sup>Within 6 months  
 OR, odds ratio  
 NS, not significant

<https://doi.org/10.1371/journal.pone.0175017.t002>

The last sentence of the first paragraph of the Results section under the subheading “Factors correlated with HIV infection of MSWs and ncMSM” should be: For ncMSM, syphilis infection (OR = 5.6; 95%CI: 3.3–9.6), receiving a lower education (Junior high school or less) (OR = 2.6; 95%CI: 1.4–4.7) and first sex with male partner (OR = 2.1; 95%CI: 1.3–3.4) were associated with HIV-positivity. Previous HIV testing (OR = 0.4; 95%CI: 0.2–0.6) and younger in age (<20) (OR = 0.6; 95%CI: 0.4–0.9) were negatively associated with HIV infection.

The last sentence of the second paragraph of the Results section under the subheading “Factors correlated with HIV infection of MSWs and ncMSM” should be: Syphilis infection (aOR = 5.9; 95%CI: 3.2–10.9), having a lower education (Junior high school or less) (aOR = 2.1; 95%CI: 1.0–4.2) and first sex with male partner (aOR = 2.1; 95%CI: 1.2–3.9) were positively associated with HIV infection in ncMSM, but having had an HIV test (aOR = 0.4; 95%CI: 0.2–0.7) was a protective factor.

The first sentence of the third paragraph of the Results section under the subheading “Factors correlated with HIV infection of MSWs and ncMSM” should be: In logistic regression analyses evaluating the risk factors for combined HIV infection (Table 4), syphilis infection, reporting ever having being diagnosed with STIs, people who are bisexual, age at sex debut (≥26) and being married were associated with HIV-positivity. After controlling for MSM type, syphilis infection and people who are bisexual were associated with an increased HIV infection.

## Reference

1. Huang Y, Zhang Y, Li K, Zhao J (2016) Changes in Prevalence of HIV or Syphilis among Male Sex Workers and Non-Commercial Men Who Have Sex with Men in Shenzhen, China: Results of a Second Survey. PLoS ONE 11(12): e0167619. <https://doi.org/10.1371/journal.pone.0167619> PMID: 27935980
